# Supplementary material for: One Step before Synthesis: Structure–Property–Condition Relationship Models to Sustainable Design of Efficient TiO2-Based Multicomponent Nanomaterials
Source: MDPI journal article supplement (doi:10.3390/ijms232113196), 2022-10-30
Supplement: s1 [file s1]

## Supporting information

# One Step before Synthesis: Structure–Property–Condition Relationship Models to Sustainable Design of Efficient TiO<sub>2</sub>-Based Multicomponent Nanomaterials

Alicja Mikolajczyk <sup>1,2,\*</sup> and Dawid Falkowski <sup>2</sup>

<sup>1</sup> Laboratory of Environmental Chemoinformatics, Faculty of Chemistry, University of Gdansk, Wita Stwosza 63, 80-308 Gdansk, Poland

<sup>2</sup> QSAR Lab., Trzy Lipy 3, 80-172 Gdansk, Poland

\* Correspondence: [alicia.mikolajczyk@ug.edu.pl](mailto:alicia.mikolajczyk@ug.edu.pl)

**Table S1.** – full virtual data base of modified TiO<sub>2</sub> nanotubes

| sample label                   | Diameter [nm] | Length [nm] | Wall thickness [nm] | Ti content in foil [% wt.] | Ag content in foil [% wt.] | V content in foil [% wt.] | Mn content in foil [% wt.] | Au content in foil [% wt.] | Pt content in foil [% wt.] | Pd content in foil [% wt.] | RE content in foil [% wt.] | Number of electrodes | Ultrasound time [min] | Drying temperature [°C] | Anodization voltage [V] | Anodization time [min] | Ethylene glycol volume [%] | H <sub>2</sub> O volume [%] | IL amount [mol/dm <sup>3</sup> ] | NH <sub>4</sub> F content [mol/dm <sup>3</sup> ] | RE(NO <sub>3</sub> ) <sub>3</sub> content [mol/dm <sup>3</sup> ] | Urea content [% weight] | Calcination time [min] | Calcination temp [°C] | UV-Vis (λ>350 nm) phenol photodegradation rate [μmol·dm <sup>-3</sup> ·min <sup>-1</sup> ] | Vis (λ> 420 nm) phenol photodegradation rate [μmol·dm <sup>-3</sup> ·min <sup>-1</sup> ] | Source |
|--------------------------------|---------------|-------------|---------------------|----------------------------|----------------------------|---------------------------|----------------------------|----------------------------|----------------------------|----------------------------|----------------------------|----------------------|-----------------------|-------------------------|-------------------------|------------------------|----------------------------|-----------------------------|----------------------------------|--------------------------------------------------|------------------------------------------------------------------|-------------------------|------------------------|-----------------------|--------------------------------------------------------------------------------------------|------------------------------------------------------------------------------------------|--------|
| IL_[EMIM]                      | 100           | 350         | 20                  | 100                        | 0                          | 0                         | 0                          | 0                          | 0                          | 0                          | 0                          | 3                    | 5                     | 80                      | 80                      | 20                     | 0,90                       | 0,10                        | 0,1                              | 0                                                | 0                                                                | 0                       | 60                     | 450                   | 1                                                                                          | 0,2                                                                                      | [1]    |
| IL_[BMIM]                      | 110           | 450         | 25                  | 100                        | 0                          | 0                         | 0                          | 0                          | 0                          | 0                          | 0                          | 3                    | 5                     | 80                      | 80                      | 20                     | 0,90                       | 0,10                        | 0,1                              | 0                                                | 0                                                                | 0                       | 60                     | 450                   | 1,26                                                                                       | 0,3                                                                                      |        |
| IL_[OMIM]                      | 120           | 700         | 30                  | 100                        | 0                          | 0                         | 0                          | 0                          | 0                          | 0                          | 0                          | 3                    | 5                     | 80                      | 80                      | 20                     | 0,90                       | 0,10                        | 0,1                              | 0                                                | 0                                                                | 0                       | 60                     | 450                   | 1,53                                                                                       | 0,48                                                                                     |        |
| IL_[OMIM]_60V                  | 90            | 200         | 15                  | 100                        | 0                          | 0                         | 0                          | 0                          | 0                          | 0                          | 0                          | 3                    | 5                     | 80                      | 60                      | 20                     | 0,90                       | 0,10                        | 0,1                              | 0                                                | 0                                                                | 0                       | 60                     | 450                   | 0,45                                                                                       | 0,16                                                                                     |        |
| IL_[OMIM]_70V                  | 110           | 600         | 25                  | 100                        | 0                          | 0                         | 0                          | 0                          | 0                          | 0                          | 0                          | 3                    | 5                     | 80                      | 70                      | 20                     | 0,90                       | 0,10                        | 0,1                              | 0                                                | 0                                                                | 0                       | 60                     | 450                   | 1,31                                                                                       | 0,41                                                                                     |        |
| IL_[OMIM]_90V                  | 135           | 850         | 35                  | 100                        | 0                          | 0                         | 0                          | 0                          | 0                          | 0                          | 0                          | 3                    | 5                     | 80                      | 90                      | 20                     | 0,90                       | 0,10                        | 0,1                              | 0                                                | 0                                                                | 0                       | 60                     | 450                   | 1,82                                                                                       | 0,63                                                                                     |        |
| IL_[OMIM]_0,2F-                | 124           | 750         | 32                  | 100                        | 0                          | 0                         | 0                          | 0                          | 0                          | 0                          | 0                          | 3                    | 5                     | 80                      | 80                      | 20                     | 0,90                       | 0,10                        | 0,2                              | 0                                                | 0                                                                | 0                       | 60                     | 450                   | 1,58                                                                                       | 0,53                                                                                     |        |
| IL_[OMIM]_0,3F-                | 129           | 810         | 35                  | 100                        | 0                          | 0                         | 0                          | 0                          | 0                          | 0                          | 0                          | 3                    | 5                     | 80                      | 80                      | 20                     | 0,90                       | 0,10                        | 0,3                              | 0                                                | 0                                                                | 0                       | 60                     | 450                   | 1,65                                                                                       | 0,55                                                                                     |        |
| IL_[OMIM]_0%H <sub>2</sub> O   | 60            | 200         | 10                  | 100                        | 0                          | 0                         | 0                          | 0                          | 0                          | 0                          | 0                          | 3                    | 5                     | 80                      | 80                      | 20                     | 1,00                       | 0,00                        | 0,1                              | 0                                                | 0                                                                | 0                       | 60                     | 450                   | 0,63                                                                                       | 0,25                                                                                     |        |
| IL_[OMIM]_2,5%H <sub>2</sub> O | 70            | 300         | 15                  | 100                        | 0                          | 0                         | 0                          | 0                          | 0                          | 0                          | 0                          | 3                    | 5                     | 80                      | 80                      | 20                     | 0,98                       | 0,03                        | 0,1                              | 0                                                | 0                                                                | 0                       | 60                     | 450                   | 0,76                                                                                       | 0,32                                                                                     |        |
| IL_[OMIM]_5,0%H <sub>2</sub> O | 80            | 650         | 20                  | 100                        | 0                          | 0                         | 0                          | 0                          | 0                          | 0                          | 0                          | 3                    | 5                     | 80                      | 80                      | 20                     | 0,95                       | 0,05                        | 0,1                              | 0                                                | 0                                                                | 0                       | 60                     | 450                   | 1,4                                                                                        | 0,39                                                                                     |        |
| IL_[OMIM]_15%H <sub>2</sub> O  | 115           | 350         | 25                  | 100                        | 0                          | 0                         | 0                          | 0                          | 0                          | 0                          | 0                          | 3                    | 5                     | 80                      | 80                      | 20                     | 0,85                       | 0,15                        | 0,1                              | 0                                                | 0                                                                | 0                       | 60                     | 450                   | 0,89                                                                                       | 0,36                                                                                     |        |
| IL2_pristine_10V               |               |             |                     | 100                        | 0                          | 0                         | 0                          | 0                          | 0                          | 0                          | 0                          | 3                    | 5                     | 80                      | 10                      | 60                     | 0,98                       | 0,02                        | 0                                | 0,2                                              | 0                                                                | 0                       | 60                     | 450                   | 0,99                                                                                       |                                                                                          |        |
| IL2_10V                        | 31,8          | 600         | 4,6                 | 100                        | 0                          | 0                         | 0                          | 0                          | 0                          | 0                          | 0                          | 3                    | 5                     | 80                      | 10                      | 60                     | 0,98                       | 0,02                        | 0,01                             | 0,2                                              | 0                                                                | 0                       | 60                     | 450                   | 2,3                                                                                        |                                                                                          |        |
| IL2_20V                        | 71,1          | 1030        | 9,3                 | 100                        | 0                          | 0                         | 0                          | 0                          | 0                          | 0                          | 0                          | 3                    | 5                     | 80                      | 20                      | 60                     | 0,98                       | 0,02                        | 0,01                             | 0,2                                              | 0                                                                | 0                       | 60                     | 450                   | 3,11                                                                                       |                                                                                          |        |
| IL2_pristine_30V               | 91,5          | 2130        | 8,4                 | 100                        | 0                          | 0                         | 0                          | 0                          | 0                          | 0                          | 0                          | 3                    | 5                     | 80                      | 30                      | 60                     | 0,98                       | 0,02                        | 0                                | 0,2                                              | 0                                                                | 0                       | 60                     | 450                   | 1,56                                                                                       |                                                                                          |        |
| IL2_0.005                      | 101,5         | 1970        | 10,2                | 100                        | 0                          | 0                         | 0                          | 0                          | 0                          | 0                          | 0                          | 3                    | 5                     | 80                      | 30                      | 60                     | 0,98                       | 0,02                        | 0,005                            | 0,2                                              | 0                                                                | 0                       | 60                     | 450                   | 3,48                                                                                       |                                                                                          |        |
| IL2_0.007                      | 108,8         | 2030        | 12,8                | 100                        | 0                          | 0                         | 0                          | 0                          | 0                          | 0                          | 0                          | 3                    | 5                     | 80                      | 30                      | 60                     | 0,98                       | 0,02                        | 0,007                            | 0,2                                              | 0                                                                | 0                       | 60                     | 450                   | 3,56                                                                                       |                                                                                          |        |
| IL2_0.01                       | 93,1          | 2050        | 11,1                | 100                        | 0                          | 0                         | 0                          | 0                          | 0                          | 0                          | 0                          | 3                    | 5                     | 80                      | 30                      | 60                     | 0,98                       | 0,02                        | 0,01                             | 0,2                                              | 0                                                                | 0                       | 60                     | 450                   | 3,37                                                                                       |                                                                                          | [2]    |
| IL2_400                        | 88,5          | 1990        | 8,9                 | 100                        | 0                          | 0                         | 0                          | 0                          | 0                          | 0                          | 0                          | 3                    | 5                     | 80                      | 30                      | 60                     | 0,98                       | 0,02                        | 0,01                             | 0,2                                              | 0                                                                | 0                       | 60                     | 400                   | 3,04                                                                                       |                                                                                          |        |
| IL2_500                        | 98,7          | 2050        | 9,4                 | 100                        | 0                          | 0                         | 0                          | 0                          | 0                          | 0                          | 0                          | 3                    | 5                     | 80                      | 30                      | 60                     | 0,98                       | 0,02                        | 0,01                             | 0,2                                              | 0                                                                | 0                       | 60                     | 500                   | 3,04                                                                                       |                                                                                          |        |
| IL2_4%H <sub>2</sub> O         | 96,2          | 1540        | 12,4                | 100                        | 0                          | 0                         | 0                          | 0                          | 0                          | 0                          | 0                          | 3                    | 5                     | 80                      | 30                      | 60                     | 0,96                       | 0,04                        | 0,01                             | 0,2                                              | 0                                                                | 0                       | 60                     | 450                   | 3,44                                                                                       |                                                                                          |        |
| IL2_6%H <sub>2</sub> O         | 98,8          | 1290        | 15,1                | 100                        | 0                          | 0                         | 0                          | 0                          | 0                          | 0                          | 0                          | 3                    | 5                     | 80                      | 30                      | 60                     | 0,94                       | 0,06                        | 0,01                             | 0,2                                              | 0                                                                | 0                       | 60                     | 450                   | 3,49                                                                                       |                                                                                          |        |
| IL2_10%H <sub>2</sub> O        | 103,9         | 1220        | 16,1                | 100                        | 0                          | 0                         | 0                          | 0                          | 0                          | 0                          | 0                          | 3                    | 5                     | 80                      | 30                      | 60                     | 0,90                       | 0,10                        | 0,01                             | 0,2                                              | 0                                                                | 0                       | 60                     | 450                   | 3,54                                                                                       |                                                                                          | [3]    |
| IL2_15%H <sub>2</sub> O        | 114,5         | 1050        | 13,1                | 100                        | 0                          | 0                         | 0                          | 0                          | 0                          | 0                          | 0                          | 3                    | 5                     | 80                      | 30                      | 60                     | 0,85                       | 0,15                        | 0,01                             | 0,2                                              | 0                                                                | 0                       | 60                     | 450                   | 3,58                                                                                       |                                                                                          |        |
| MM_NT                          |               |             |                     | 100                        | 0                          | 0                         | 0                          | 0                          | 0                          | 0                          | 0                          | 2                    | 5                     | 80                      | 30                      | 60                     | 0,98                       | 0,02                        | 0,00                             | 0,09                                             | 0                                                                | 0                       | 60                     | 450                   |                                                                                            |                                                                                          |        |
| MM_Ag-NT                       | 90            | 2300        | 16                  | 100                        | 0                          | 0                         | 0                          | 0                          | 0                          | 0                          | 0                          | 2                    | 5                     | 80                      | 30                      | 60                     | 0,98                       | 0,02                        | 0,00                             | 0,09                                             | 0                                                                | 0                       | 60                     | 450                   |                                                                                            |                                                                                          |        |
| MM_Cu-NT_I                     | 90            | 2300        | 16                  | 100                        | 0                          | 0                         | 0                          | 0                          | 0                          | 0                          | 0                          | 2                    | 5                     | 80                      | 30                      | 60                     | 0,98                       | 0,02                        | 0,00                             | 0,09                                             | 0                                                                | 0                       | 60                     | 450                   |                                                                                            |                                                                                          |        |
| MM_Cu-NT_II                    | 90            | 2300        | 16                  | 100                        | 0                          | 0                         | 0                          | 0                          | 0                          | 0                          | 0                          | 2                    | 5                     | 80                      | 30                      | 60                     | 0,98                       | 0,02                        | 0,00                             | 0,09                                             | 0                                                                | 0                       | 60                     | 450                   |                                                                                            |                                                                                          |        |
| MM_Cu-NT_III                   | 90            | 2300        | 16                  | 100                        | 0                          | 0                         | 0                          | 0                          | 0                          | 0                          | 0                          | 2                    | 5                     | 80                      | 30                      | 60                     | 0,98                       | 0,02                        | 0,00                             | 0,09                                             | 0                                                                | 0                       | 60                     | 450                   |                                                                                            |                                                                                          |        |
| MM_Cu-NT_IV                    | 90            | 2300        | 16                  | 100                        | 0                          | 0                         | 0                          | 0                          | 0                          | 0                          | 0                          | 2                    | 5                     | 80                      | 30                      | 60                     | 0,98                       | 0,02                        | 0,00                             | 0,09                                             | 0                                                                | 0                       | 60                     | 450                   |                                                                                            |                                                                                          |        |
| MM_AgCu-NT_I                   | 90            | 2300        | 16                  | 100                        | 0                          | 0                         | 0                          | 0                          | 0                          | 0                          | 0                          | 2                    | 5                     | 80                      | 30                      | 60                     | 0,98                       | 0,02                        | 0,00                             | 0,09                                             | 0                                                                | 0                       | 60                     | 450                   |                                                                                            |                                                                                          |        |
| MM_AgCu-NT_II                  | 90            | 2300        | 16                  | 100                        | 0                          | 0                         | 0                          | 0                          | 0                          | 0                          | 0                          | 2                    | 5                     | 80                      | 30                      | 60                     | 0,98                       | 0,02                        | 0,00                             | 0,09                                             | 0                                                                | 0                       | 60                     | 450                   |                                                                                            |                                                                                          |        |
| MM_AgCu-NT_III                 | 90            | 2300        | 16                  | 100                        | 0                          | 0                         | 0                          | 0                          | 0                          | 0                          | 0                          | 2                    | 5                     | 80                      | 30                      | 60                     | 0,98                       | 0,02                        | 0,00                             | 0,09                                             | 0                                                                | 0                       | 60                     | 450                   |                                                                                            |                                                                                          |        |

| sample label       | Diameter [nm] | Length [nm] | Wall thickness [nm] | Ti content in foil [% wt.] | Ag content in foil [% wt.] | V content in foil [% wt.] | Mn content in foil [% wt.] | Au content in foil [% wt.] | Pt content in foil [% wt.] | Pd content in foil [% wt.] | RE content in foil [% wt.] | Number of electrodes | Ultrasound time [min] | Drying temperature [°C] | Anodization voltage [V] | Anodization time [min] | Ethylene glycol volume [%] | H2O volume [%] | IL amount [mol/dm3] | NH4F content [mol/dm3] | RE(NO3)3 content [mol/dm3] | Urea content [% weight] | Calcination time [min] | Calcination temp [°C] | UV-Vis ( $\lambda > 350$ nm) phenol photodegradation rate [ $\mu\text{mol-dm}^{-3} \cdot \text{min}^{-1}$ ] | Vis ( $\lambda > 420$ nm) phenol photodegradation rate [ $\mu\text{mol-dm}^{-3} \cdot \text{min}^{-1}$ ] | Source |
|--------------------|---------------|-------------|---------------------|----------------------------|----------------------------|---------------------------|----------------------------|----------------------------|----------------------------|----------------------------|----------------------------|----------------------|-----------------------|-------------------------|-------------------------|------------------------|----------------------------|----------------|---------------------|------------------------|----------------------------|-------------------------|------------------------|-----------------------|-------------------------------------------------------------------------------------------------------------|----------------------------------------------------------------------------------------------------------|--------|
| MM_AgCu-NT_IV      | 90            | 2300        | 16                  | 100                        | 0                          | 0                         | 0                          | 0                          | 0                          | 0                          | 0                          | 2                    | 5                     | 80                      | 30                      | 60                     | 0,98                       | 0,02           | 0,00                | 0,09                   | 0                          | 0                       | 60                     | 450                   |                                                                                                             |                                                                                                          |        |
| MM_Bi-NT_I         | 90            | 2300        | 16                  | 100                        | 0                          | 0                         | 0                          | 0                          | 0                          | 0                          | 0                          | 2                    | 5                     | 80                      | 30                      | 60                     | 0,98                       | 0,02           | 0,00                | 0,09                   | 0                          | 0                       | 60                     | 450                   |                                                                                                             |                                                                                                          |        |
| MM_Bi-NT_II        | 90            | 2300        | 16                  | 100                        | 0                          | 0                         | 0                          | 0                          | 0                          | 0                          | 0                          | 2                    | 5                     | 80                      | 30                      | 60                     | 0,98                       | 0,02           | 0,00                | 0,09                   | 0                          | 0                       | 60                     | 450                   |                                                                                                             |                                                                                                          |        |
| MM_Bi-NT_III       | 90            | 2300        | 16                  | 100                        | 0                          | 0                         | 0                          | 0                          | 0                          | 0                          | 0                          | 2                    | 5                     | 80                      | 30                      | 60                     | 0,98                       | 0,02           | 0,00                | 0,09                   | 0                          | 0                       | 60                     | 450                   |                                                                                                             |                                                                                                          |        |
| MM_Bi-NT_IV        | 90            | 2300        | 16                  | 100                        | 0                          | 0                         | 0                          | 0                          | 0                          | 0                          | 0                          | 2                    | 5                     | 80                      | 30                      | 60                     | 0,98                       | 0,02           | 0,00                | 0,09                   | 0                          | 0                       | 60                     | 450                   |                                                                                                             |                                                                                                          |        |
| NT_20V_1h          | 54            | 800         | 6                   | 100                        | 0                          | 0                         | 0                          | 0                          | 0                          | 0                          | 0                          | 2                    | 5                     | 80                      | 20                      | 60                     | 0,98                       | 0,02           | 0,00                | 0,09                   | 0                          | 0                       | 60                     | 450                   | 1,86                                                                                                        | 0,05                                                                                                     |        |
| NT_30V_1h          | 65            | 1700        | 6                   | 100                        | 0                          | 0                         | 0                          | 0                          | 0                          | 0                          | 0                          | 2                    | 5                     | 80                      | 30                      | 60                     | 0,98                       | 0,02           | 0,00                | 0,09                   | 0                          | 0                       | 60                     | 450                   | 2,02                                                                                                        | 0,16                                                                                                     |        |
| NT_40V_1h          | 72            | 2200        | 6                   | 100                        | 0                          | 0                         | 0                          | 0                          | 0                          | 0                          | 0                          | 2                    | 5                     | 80                      | 40                      | 60                     | 0,98                       | 0,02           | 0,00                | 0,09                   | 0                          | 0                       | 60                     | 450                   | 4,25                                                                                                        | 0,37                                                                                                     |        |
| NT_50V_1h          | 78            | 2700        | 14                  | 100                        | 0                          | 0                         | 0                          | 0                          | 0                          | 0                          | 0                          | 2                    | 5                     | 80                      | 50                      | 60                     | 0,98                       | 0,02           | 0,00                | 0,09                   | 0                          | 0                       | 60                     | 450                   | 2,13                                                                                                        | 0,27                                                                                                     |        |
| NT_40V_0.5h        | 66            | 1600        | 6                   | 100                        | 0                          | 0                         | 0                          | 0                          | 0                          | 0                          | 0                          | 2                    | 5                     | 80                      | 40                      | 30                     | 0,98                       | 0,02           | 0,00                | 0,09                   | 0                          | 0                       | 60                     | 450                   | 2,1                                                                                                         | 0,11                                                                                                     |        |
| NT_40V_2h          | 96            | 3800        | 11,5                | 100                        | 0                          | 0                         | 0                          | 0                          | 0                          | 0                          | 0                          | 2                    | 5                     | 80                      | 40                      | 120                    | 0,98                       | 0,02           | 0,00                | 0,09                   | 0                          | 0                       | 60                     | 450                   | 2,23                                                                                                        | 0,12                                                                                                     |        |
| N-NT_0.2%_20V_1h   | 61            | 1000        | 10,5                | 100                        | 0                          | 0                         | 0                          | 0                          | 0                          | 0                          | 0                          | 2                    | 5                     | 80                      | 20                      | 60                     | 0,98                       | 0,02           | 0,00                | 0,09                   | 0                          | 0,2                     | 60                     | 450                   | 2,13                                                                                                        | 0,27                                                                                                     |        |
| N-NT_0.2%_30V_1h   | 76            | 2000        | 11                  | 100                        | 0                          | 0                         | 0                          | 0                          | 0                          | 0                          | 0                          | 2                    | 5                     | 80                      | 30                      | 60                     | 0,98                       | 0,02           | 0,00                | 0,09                   | 0                          | 0,2                     | 60                     | 450                   | 2,34                                                                                                        | 0,69                                                                                                     | [4]    |
| N-NT_0.2%_40V_1h   | 89            | 3500        | 10,5                | 100                        | 0                          | 0                         | 0                          | 0                          | 0                          | 0                          | 0                          | 2                    | 5                     | 80                      | 40                      | 60                     | 0,98                       | 0,02           | 0,00                | 0,09                   | 0                          | 0,2                     | 60                     | 450                   | 4,53                                                                                                        | 1,33                                                                                                     |        |
| N-NT_0.2%_50V_1h   | 114           | 6800        | 9,5                 | 100                        | 0                          | 0                         | 0                          | 0                          | 0                          | 0                          | 0                          | 2                    | 5                     | 80                      | 50                      | 60                     | 0,98                       | 0,02           | 0,00                | 0,09                   | 0                          | 0,2                     | 60                     | 450                   | 3,45                                                                                                        | 1,01                                                                                                     |        |
| N-NT_0.2%_40V_0.5h | 70            | 1600        | 7                   | 100                        | 0                          | 0                         | 0                          | 0                          | 0                          | 0                          | 0                          | 2                    | 5                     | 80                      | 40                      | 30                     | 0,98                       | 0,02           | 0,00                | 0,09                   | 0                          | 0,2                     | 60                     | 450                   | 2,39                                                                                                        | 0,53                                                                                                     |        |
| N-NT_0.2%_40V_2h   | 112           | 4800        | 13,5                | 100                        | 0                          | 0                         | 0                          | 0                          | 0                          | 0                          | 0                          | 2                    | 5                     | 80                      | 40                      | 120                    | 0,98                       | 0,02           | 0,00                | 0,09                   | 0                          | 0,2                     | 60                     | 450                   | 3,72                                                                                                        | 1,06                                                                                                     |        |
| N-NT_0.1%_40V_1h   | 72            | 3500        | 4,5                 | 100                        | 0                          | 0                         | 0                          | 0                          | 0                          | 0                          | 0                          | 2                    | 5                     | 80                      | 40                      | 60                     | 0,98                       | 0,02           | 0,00                | 0,09                   | 0                          | 0,1                     | 60                     | 450                   | 4,25                                                                                                        | 0,96                                                                                                     |        |
| N-NT_0.3%_40V_1h   | 63            | 3400        | 4,5                 | 100                        | 0                          | 0                         | 0                          | 0                          | 0                          | 0                          | 0                          | 2                    | 5                     | 80                      | 40                      | 60                     | 0,98                       | 0,02           | 0,00                | 0,09                   | 0                          | 0,3                     | 60                     | 450                   | 4,36                                                                                                        | 0,8                                                                                                      |        |
| N-NT_0.5%_40V_1h   | 71            | 3400        | 6                   | 100                        | 0                          | 0                         | 0                          | 0                          | 0                          | 0                          | 0                          | 2                    | 5                     | 80                      | 40                      | 60                     | 0,98                       | 0,02           | 0,00                | 0,09                   | 0                          | 0,5                     | 60                     | 450                   | 4,09                                                                                                        | 0,48                                                                                                     |        |
| REE_base           | 85            | 2500        | 15                  | 100                        | 0                          | 0                         | 0                          | 0                          | 0                          | 0                          | 0                          | 2                    | 5                     | 80                      | 30                      | 60                     | 0,98                       | 0,02           | 0                   | 0,1                    | 0,025                      | 0                       | 60                     | 450                   |                                                                                                             |                                                                                                          |        |
| REE_Er             | 85            | 2500        | 15                  | 100                        | 0                          | 0                         | 0                          | 0                          | 0                          | 0                          | 0                          | 2                    | 5                     | 80                      | 30                      | 60                     | 0,98                       | 0,02           | 0                   | 0,1                    | 0,025                      | 0                       | 60                     | 450                   |                                                                                                             |                                                                                                          |        |
| REE_Yb             | 85            | 2500        | 15                  | 100                        | 0                          | 0                         | 0                          | 0                          | 0                          | 0                          | 0                          | 2                    | 5                     | 80                      | 30                      | 60                     | 0,98                       | 0,02           | 0                   | 0,1                    | 0,025                      | 0                       | 60                     | 450                   |                                                                                                             |                                                                                                          |        |
| REE_Ho             | 85            | 2500        | 15                  | 100                        | 0                          | 0                         | 0                          | 0                          | 0                          | 0                          | 0                          | 2                    | 5                     | 80                      | 30                      | 60                     | 0,98                       | 0,02           | 0                   | 0,1                    | 0,025                      | 0                       | 60                     | 450                   |                                                                                                             |                                                                                                          | [5]    |
| REE_Tb             | 85            | 2500        | 15                  | 100                        | 0                          | 0                         | 0                          | 0                          | 0                          | 0                          | 0                          | 2                    | 5                     | 80                      | 30                      | 60                     | 0,98                       | 0,02           | 0                   | 0,1                    | 0,025                      | 0                       | 60                     | 450                   |                                                                                                             |                                                                                                          |        |
| REE_Gd             | 85            | 2500        | 15                  | 100                        | 0                          | 0                         | 0                          | 0                          | 0                          | 0                          | 0                          | 2                    | 5                     | 80                      | 30                      | 60                     | 0,98                       | 0,02           | 0                   | 0,1                    | 0,025                      | 0                       | 60                     | 450                   |                                                                                                             |                                                                                                          |        |
| REE_Pr             | 85            | 2500        | 15                  | 100                        | 0                          | 0                         | 0                          | 0                          | 0                          | 0                          | 0                          | 2                    | 5                     | 80                      | 30                      | 60                     | 0,98                       | 0,02           | 0                   | 0,1                    | 0,025                      | 0                       | 60                     | 450                   |                                                                                                             |                                                                                                          |        |
| REE2_Ti_30V        | 80            | 1500        | 10                  | 100                        | 0                          | 0                         | 0                          | 0                          | 0                          | 0                          | 0                          | 2                    | 5                     | 80                      | 40                      | 60                     | 0,98                       | 0,02           | 0                   | 0,09                   |                            | 0                       | 60                     | 450                   | 1,25                                                                                                        | 0,04                                                                                                     |        |
| REE2_Ti_40V        | 100           | 3000        | 13                  | 100                        | 0                          | 0                         | 0                          | 0                          | 0                          | 0                          | 0                          | 2                    | 5                     | 80                      | 40                      | 60                     | 0,98                       | 0,02           | 0                   | 0,09                   |                            | 0                       | 60                     | 450                   | 1,35                                                                                                        | 0,13                                                                                                     |        |
| REE2_Ti_50V        | 120           | 6000        | 18                  | 100                        | 0                          | 0                         | 0                          | 0                          | 0                          | 0                          | 0                          | 2                    | 5                     | 80                      | 40                      | 60                     | 0,98                       | 0,02           | 0                   | 0,09                   |                            | 0                       | 60                     | 450                   | 1,44                                                                                                        | 0,15                                                                                                     |        |
| REE2_Ti90Ho10_40V  | 99            | 5600        | 19                  | 90                         | 0                          | 0                         | 0                          | 0                          | 0                          | 0                          | 10                         | 2                    | 5                     | 80                      | 40                      | 60                     | 0,98                       | 0,02           | 0                   | 0,09                   |                            | 0                       | 60                     | 450                   | 2,37                                                                                                        | 0,45                                                                                                     |        |
| REE2_Ti90Er10_40V  | 98            | 5500        | 19                  | 90                         | 0                          | 0                         | 0                          | 0                          | 0                          | 0                          | 10                         | 2                    | 5                     | 80                      | 40                      | 60                     | 0,98                       | 0,02           | 0                   | 0,09                   |                            | 0                       | 60                     | 450                   | 1,82                                                                                                        | 0,43                                                                                                     | [6]    |
| REE2_Ti90Nd10_40V  | 98            | 5300        | 18                  | 90                         | 0                          | 0                         | 0                          | 0                          | 0                          | 0                          | 10                         | 2                    | 5                     | 80                      | 40                      | 60                     | 0,98                       | 0,02           | 0                   | 0,09                   |                            | 0                       | 60                     | 450                   | 3,04                                                                                                        | 0,4                                                                                                      |        |
| REE2_Ti90Y10_40V   | 98            | 4500        | 18                  | 90                         | 0                          | 0                         | 0                          | 0                          | 0                          | 0                          | 10                         | 2                    | 5                     | 80                      | 40                      | 60                     | 0,98                       | 0,02           | 0                   | 0,09                   |                            | 0                       | 60                     | 450                   | 2,12                                                                                                        | 0,13                                                                                                     |        |
| REE2_Ti90Ce10_40V  | 96            | 4600        | 17                  | 90                         | 0                          | 0                         | 0                          | 0                          | 0                          | 0                          | 10                         | 2                    | 5                     | 80                      | 40                      | 60                     | 0,98                       | 0,02           | 0                   | 0,09                   |                            | 0                       | 60                     | 450                   | 3,09                                                                                                        | 0                                                                                                        |        |
| REE2_Ti90Tm10_40V  | 95            | 4800        | 17                  | 90                         | 0                          | 0                         | 0                          | 0                          | 0                          | 0                          | 10                         | 2                    | 5                     | 80                      | 40                      | 60                     | 0,98                       | 0,02           | 0                   | 0,09                   |                            | 0                       | 60                     | 450                   | 2,96                                                                                                        | 0,26                                                                                                     |        |

| sample label         | Diameter [nm] | Length [nm] | Wall thickness [nm] | Ti content in foil [% wt.] | Ag content in foil [% wt.] | V content in foil [% wt.] | Mn content in foil [% wt.] | Au content in foil [% wt.] | Pt content in foil [% wt.] | Pd content in foil [% wt.] | RE content in foil [% wt.] | Number of electrodes | Ultrasound time [min] | Drying temperature [°C] | Anodization voltage [V] | Anodization time [min] | Ethylene glycol volume [%] | H2O volume [%] | IL amount [mol/dm3] | NH4F content [mol/dm3] | RE(NO3)3 content [mol/dm3] | Urea content [% weight] | Calcination time [min] | Calcination temp [°C] | UV-Vis ( $\lambda > 350$ nm) phenol photodegradation rate [ $\mu\text{mol-dm}^{-3} \cdot \text{min}^{-1}$ ] | Vis ( $\lambda > 420$ nm) phenol photodegradation rate [ $\mu\text{mol-dm}^{-3} \cdot \text{min}^{-1}$ ] | Source |
|----------------------|---------------|-------------|---------------------|----------------------------|----------------------------|---------------------------|----------------------------|----------------------------|----------------------------|----------------------------|----------------------------|----------------------|-----------------------|-------------------------|-------------------------|------------------------|----------------------------|----------------|---------------------|------------------------|----------------------------|-------------------------|------------------------|-----------------------|-------------------------------------------------------------------------------------------------------------|----------------------------------------------------------------------------------------------------------|--------|
| Ag2O_Ti_30V          | 80            | 1500        | 10                  | 100                        | 0                          | 0                         | 0                          | 0                          | 0                          | 0                          | 0                          | 3                    | 5                     | 80                      | 30                      | 60                     | 0,98                       | 0,02           | 0                   | 0,09                   |                            | 0                       | 60                     | 450                   | 1,25                                                                                                        | 0,04                                                                                                     | [7]    |
| Ag2O_Ti_40V          | 100           | 3000        | 13                  | 100                        | 0                          | 0                         | 0                          | 0                          | 0                          | 0                          | 0                          | 3                    | 5                     | 80                      | 40                      | 60                     | 0,98                       | 0,02           | 0                   | 0,09                   |                            | 0                       | 60                     | 450                   | 1,35                                                                                                        | 0,13                                                                                                     |        |
| Ag2O_Ti_50V          | 120           | 6000        | 18                  | 100                        | 0                          | 0                         | 0                          | 0                          | 0                          | 0                          | 0                          | 3                    | 5                     | 80                      | 50                      | 60                     | 0,98                       | 0,02           | 0                   | 0,09                   |                            | 0                       | 60                     | 450                   | 1,44                                                                                                        | 0,15                                                                                                     |        |
| Ag2O_Ti95Ag5_30V     | 70            | 1500        | 12                  | 95                         | 5                          | 0                         | 0                          | 0                          | 0                          | 0                          | 0                          | 3                    | 5                     | 80                      | 30                      | 60                     | 0,98                       | 0,02           | 0                   | 0,09                   |                            | 0                       | 60                     | 450                   | 1,61                                                                                                        | 0,30                                                                                                     |        |
| Ag2O_Ti90Ag10_30V    | 70            | 1500        | 12                  | 90                         | 10                         | 0                         | 0                          | 0                          | 0                          | 0                          | 0                          | 3                    | 5                     | 80                      | 30                      | 60                     | 0,98                       | 0,02           | 0                   | 0,09                   |                            | 0                       | 60                     | 450                   | 2,52                                                                                                        | 0,38                                                                                                     |        |
| Ag2O_Ti85Ag15_30V    | 70            | 1500        | 12                  | 85                         | 15                         | 0                         | 0                          | 0                          | 0                          | 0                          | 0                          | 3                    | 5                     | 80                      | 30                      | 60                     | 0,98                       | 0,02           | 0                   | 0,09                   |                            | 0                       | 60                     | 450                   | 1,83                                                                                                        | 0,50                                                                                                     |        |
| Ag2O_Ti90Ag10_40V    | 90            | 3000        | 15                  | 90                         | 10                         | 0                         | 0                          | 0                          | 0                          | 0                          | 0                          | 3                    | 5                     | 80                      | 40                      | 60                     | 0,98                       | 0,02           | 0                   | 0,09                   |                            | 0                       | 60                     | 450                   | 2,66                                                                                                        | 0,50                                                                                                     |        |
| Ag2O_Ti90Ag10_50V    | 115           | 6000        | 20                  | 90                         | 10                         | 0                         | 0                          | 0                          | 0                          | 0                          | 0                          | 3                    | 5                     | 80                      | 50                      | 60                     | 0,98                       | 0,02           | 0                   | 0,09                   |                            | 0                       | 60                     | 450                   | 2,89                                                                                                        | 0,41                                                                                                     | [8]    |
| BiPt_NT*s            | 85            | 2500        | 15                  | 100                        | 0                          | 0                         | 0                          | 0                          | 0                          | 0                          | 0                          | 3                    | 5                     | 80                      | 40                      | 60                     | 0,98                       | 0,02           | 0                   | 0,09                   |                            | 0                       | 60                     | 450                   |                                                                                                             |                                                                                                          |        |
| BiPt_1Pt-NTs         | 85            | 2500        | 15                  | 100                        | 0                          | 0                         | 0                          | 0                          | 0                          | 0                          | 0                          | 3                    | 5                     | 80                      | 40                      | 60                     | 0,98                       | 0,02           | 0                   | 0,09                   |                            | 0                       | 60                     | 450                   |                                                                                                             |                                                                                                          |        |
| BiPt_Pt-NTs*         | 85            | 2500        | 15                  | 100                        | 0                          | 0                         | 0                          | 0                          | 0                          | 0                          | 0                          | 3                    | 5                     | 80                      | 40                      | 60                     | 0,98                       | 0,02           | 0                   | 0,09                   |                            | 0                       | 60                     | 450                   |                                                                                                             |                                                                                                          |        |
| BiPt_2Pt-NTs         | 85            | 2500        | 15                  | 100                        | 0                          | 0                         | 0                          | 0                          | 0                          | 0                          | 0                          | 3                    | 5                     | 80                      | 40                      | 60                     | 0,98                       | 0,02           | 0                   | 0,09                   |                            | 0                       | 60                     | 450                   |                                                                                                             |                                                                                                          |        |
| BiPt_2Bi2S3-NTs      | 85            | 2500        | 15                  | 100                        | 0                          | 0                         | 0                          | 0                          | 0                          | 0                          | 0                          | 3                    | 5                     | 80                      | 40                      | 60                     | 0,98                       | 0,02           | 0                   | 0,09                   |                            | 0                       | 60                     | 450                   |                                                                                                             |                                                                                                          |        |
| BiPt_Bi2S3-NTs*      | 85            | 2500        | 15                  | 100                        | 0                          | 0                         | 0                          | 0                          | 0                          | 0                          | 0                          | 3                    | 5                     | 80                      | 40                      | 60                     | 0,98                       | 0,02           | 0                   | 0,09                   |                            | 0                       | 60                     | 450                   |                                                                                                             |                                                                                                          |        |
| BiPt_6Bi2S3-NTs      | 85            | 2500        | 15                  | 100                        | 0                          | 0                         | 0                          | 0                          | 0                          | 0                          | 0                          | 3                    | 5                     | 80                      | 40                      | 60                     | 0,98                       | 0,02           | 0                   | 0,09                   |                            | 0                       | 60                     | 450                   |                                                                                                             |                                                                                                          | [9]    |
| BiPt_Bi2S3-Pt-NTs*   | 85            | 2500        | 15                  | 100                        | 0                          | 0                         | 0                          | 0                          | 0                          | 0                          | 0                          | 3                    | 5                     | 80                      | 40                      | 60                     | 0,98                       | 0,02           | 0                   | 0,09                   |                            | 0                       | 60                     | 450                   |                                                                                                             |                                                                                                          |        |
| IL4_0.05             | 107           | 6000        | 5,4                 | 100                        | 0                          | 0                         | 0                          | 0                          | 0                          | 0                          | 0                          | 3                    | 5                     | 80                      | 40                      | 60                     | 0,97                       | 0,03           | 0,005               | 0,2                    |                            | 0                       | 60                     | 450                   | 5,53                                                                                                        |                                                                                                          |        |
| IL4_0.1              | 114           | 6200        | 9,4                 | 100                        | 0                          | 0                         | 0                          | 0                          | 0                          | 0                          | 0                          | 3                    | 5                     | 80                      | 40                      | 60                     | 0,96                       | 0,04           | 0,01                | 0,2                    |                            | 0                       | 60                     | 450                   | 9,12                                                                                                        |                                                                                                          |        |
| IL4_0.2              | 115           | 6200        | 10                  | 100                        | 0                          | 0                         | 0                          | 0                          | 0                          | 0                          | 0                          | 3                    | 5                     | 80                      | 40                      | 60                     | 0,95                       | 0,05           | 0,021               | 0,2                    |                            | 0                       | 60                     | 450                   | 8,35                                                                                                        |                                                                                                          |        |
| IL4_0.3              | 119           | 6800        | 11                  | 100                        | 0                          | 0                         | 0                          | 0                          | 0                          | 0                          | 0                          | 3                    | 5                     | 80                      | 40                      | 60                     | 0,94                       | 0,06           | 0,031               | 0,2                    |                            | 0                       | 60                     | 450                   | 8,45                                                                                                        |                                                                                                          |        |
| IL4_0.5              | 133           | 7200        | 13                  | 100                        | 0                          | 0                         | 0                          | 0                          | 0                          | 0                          | 0                          | 3                    | 5                     | 80                      | 40                      | 60                     | 0,93                       | 0,07           | 0,051               | 0,2                    |                            | 0                       | 60                     | 450                   | 8,38                                                                                                        |                                                                                                          |        |
| IL4_1.0              | 140           | 8100        | 15                  | 100                        | 0                          | 0                         | 0                          | 0                          | 0                          | 0                          | 0                          | 3                    | 5                     | 80                      | 40                      | 60                     | 0,92                       | 0,08           | 0,103               | 0,2                    |                            | 0                       | 60                     | 450                   | 8,59                                                                                                        |                                                                                                          | [10]   |
| MnO_Ti_30V           | 81            | 1500        | 10                  | 100                        | 0                          | 0                         | 0                          | 0                          | 0                          | 0                          | 0                          | 3                    | 1                     | 80                      | 30                      | 60                     | 0,98                       | 0,02           | 0                   | 0,09                   |                            | 0                       | 60                     | 450                   | 7,1                                                                                                         |                                                                                                          |        |
| MnO_Ti_40V           | 100           | 5000        | 13                  | 100                        | 0                          | 0                         | 0                          | 0                          | 0                          | 0                          | 0                          | 3                    | 1                     | 80                      | 40                      | 60                     | 0,98                       | 0,02           | 0                   | 0,09                   |                            | 0                       | 60                     | 450                   |                                                                                                             |                                                                                                          |        |
| MnO_Ti_50V           | 120           | 16200       | 18                  | 100                        | 0                          | 0                         | 0                          | 0                          | 0                          | 0                          | 0                          | 3                    | 1                     | 80                      | 50                      | 60                     | 0,98                       | 0,02           | 0                   | 0,09                   |                            | 0                       | 60                     | 450                   |                                                                                                             |                                                                                                          |        |
| MnO_Ti90Mn10_30V     | 76            | 1000        | 8                   | 90                         | 0                          | 0                         | 10                         | 0                          | 0                          | 0                          | 0                          | 3                    | 1                     | 80                      | 30                      | 60                     | 0,98                       | 0,02           | 0                   | 0,09                   |                            | 0                       | 60                     | 450                   |                                                                                                             |                                                                                                          |        |
| MnO_Ti90Mn10_40V     | 92            | 1500        | 9                   | 90                         | 0                          | 0                         | 10                         | 0                          | 0                          | 0                          | 0                          | 3                    | 1                     | 80                      | 40                      | 60                     | 0,98                       | 0,02           | 0                   | 0,09                   |                            | 0                       | 60                     | 450                   |                                                                                                             |                                                                                                          |        |
| MnO_Ti90Mn10_50V     | 118           | 2800        | 9                   | 90                         | 0                          | 0                         | 10                         | 0                          | 0                          | 0                          | 0                          | 3                    | 1                     | 80                      | 50                      | 60                     | 0,98                       | 0,02           | 0                   | 0,09                   |                            | 0                       | 60                     | 450                   |                                                                                                             |                                                                                                          |        |
| MnO_Ti85Mn15_40V_2%  | 94            | 1300        | 9                   | 85                         | 0                          | 0                         | 15                         | 0                          | 0                          | 0                          | 0                          | 3                    | 1                     | 80                      | 40                      | 60                     | 0,98                       | 0,02           | 0                   | 0,09                   |                            | 0                       | 60                     | 450                   |                                                                                                             |                                                                                                          | [11]   |
| MnO_Ti85Mn15_40V_5%  | 90            | 1300        | 9                   | 85                         | 0                          | 0                         | 15                         | 0                          | 0                          | 0                          | 0                          | 3                    | 1                     | 80                      | 40                      | 60                     | 0,95                       | 0,05           | 0                   | 0,09                   |                            | 0                       | 60                     | 450                   |                                                                                                             |                                                                                                          |        |
| MnO_Ti85Mn15_40V_10% | 115           | 1100        | 11                  | 85                         | 0                          | 0                         | 15                         | 0                          | 0                          | 0                          | 0                          | 3                    | 1                     | 80                      | 40                      | 60                     | 0,9                        | 0,1            | 0                   | 0,09                   |                            | 0                       | 60                     | 450                   |                                                                                                             |                                                                                                          |        |
| MnO_Ti95Mn5_40V      | 94            | 3400        | 9                   | 95                         | 0                          | 0                         | 5                          | 0                          | 0                          | 0                          | 0                          | 3                    | 1                     | 80                      | 40                      | 60                     | 0,98                       | 0,02           | 0                   | 0,09                   |                            | 0                       | 60                     | 450                   |                                                                                                             |                                                                                                          |        |
| V2O5_Ti90V10_30V     | 61            | 800         | 13                  | 90                         | 0                          | 10                        | 0                          | 0                          | 0                          | 0                          | 0                          | 3                    | 1                     | 80                      | 30                      | 60                     | 0,98                       | 0,02           | 0                   | 0,09                   |                            | 0                       | 60                     | 450                   |                                                                                                             |                                                                                                          |        |
| V2O5_Ti90V10_40V     | 91            | 300         | 19                  | 90                         | 0                          | 10                        | 0                          | 0                          | 0                          | 0                          | 0                          | 3                    | 1                     | 80                      | 40                      | 60                     | 0,98                       | 0,02           | 0                   | 0,09                   |                            | 0                       | 60                     | 450                   |                                                                                                             |                                                                                                          |        |
| V2O5_Ti90V10_50V     | 101           | 400         | 30                  | 90                         | 0                          | 10                        | 0                          | 0                          | 0                          | 0                          | 0                          | 3                    | 1                     | 80                      | 50                      | 60                     | 0,98                       | 0,02           | 0                   | 0,09                   |                            | 0                       | 60                     | 450                   |                                                                                                             |                                                                                                          |        |
| V2O5_Ti85V15_40V_2%  |               |             |                     | 85                         | 0                          | 15                        | 0                          | 0                          | 0                          | 0                          | 0                          | 3                    | 1                     | 80                      | 40                      | 60                     | 0,98                       | 0,02           | 0                   | 0,09                   |                            | 0                       | 60                     | 450                   |                                                                                                             |                                                                                                          |        |

| sample label         | Diameter [nm] | Lenght [nm] | Wall thickness [nm] | Ti content in foil [% wt.] | Ag content in foil [% wt.] | V content in foil [% wt.] | Mn content in foil [% wt.] | Au content in foil [% wt.] | Pt content in foil [% wt.] | Pd content in foil [% wt.] | RE content in foil [% wt.] | Number of electrodes | Ultrasound time [min] | Drying temperature [°C] | Anodization voltage [V] | Anodization time [min] | Ethylene glycol volume [%] | H2O volume [%] | IL amount [mol/dm3] | NH4F content [mol/dm3] | RE(NO3)3 content [mol/dm3] | Urea content [% weight] | Calcination time [min] | Calcination temp [°C] | UV-Vis (λ>350 nm) phenol photodegradation rate [μmol-dm-3· min-1] | Vis (λ> 420 nm) phenol photodegradation rate [μmol-dm3· min-1] | Source |
|----------------------|---------------|-------------|---------------------|----------------------------|----------------------------|---------------------------|----------------------------|----------------------------|----------------------------|----------------------------|----------------------------|----------------------|-----------------------|-------------------------|-------------------------|------------------------|----------------------------|----------------|---------------------|------------------------|----------------------------|-------------------------|------------------------|-----------------------|-------------------------------------------------------------------|----------------------------------------------------------------|--------|
| V2O5_Ti85V15_40V_5%  | 103           | 900         | 20                  | 85                         | 0                          | 15                        | 0                          | 0                          | 0                          | 0                          | 0                          | 3                    | 1                     | 80                      | 40                      | 60                     | 0,95                       | 0,05           | 0                   | 0,09                   |                            | 0                       | 60                     | 450                   |                                                                   |                                                                |        |
| V2O5_Ti85V15_40V_10% |               |             |                     | 85                         | 0                          | 15                        | 0                          | 0                          | 0                          | 0                          | 0                          | 3                    | 1                     | 80                      | 40                      | 60                     | 0,9                        | 0,1            | 0                   | 0,09                   |                            | 0                       | 60                     | 450                   |                                                                   |                                                                |        |
| V2O5_Ti95V5_40V      | 86            | 1000        | 11                  | 95                         | 0                          | 5                         | 0                          | 0                          | 0                          | 0                          | 0                          | 3                    | 1                     | 80                      | 40                      | 60                     | 0,98                       | 0,02           | 0                   | 0,09                   |                            | 0                       | 60                     | 450                   |                                                                   |                                                                |        |
| V2O5_Ti_30V          | 81            | 1500        | 10                  | 100                        | 0                          | 0                         | 0                          | 0                          | 0                          | 0                          | 0                          | 3                    | 1                     | 80                      | 30                      | 60                     | 0,98                       | 0,02           | 0                   | 0,09                   |                            | 0                       | 60                     | 450                   |                                                                   |                                                                |        |
| V2O5_Ti_40V          | 100           | 5000        | 13                  | 100                        | 0                          | 0                         | 0                          | 0                          | 0                          | 0                          | 0                          | 3                    | 1                     | 80                      | 40                      | 60                     | 0,98                       | 0,02           | 0                   | 0,09                   |                            | 0                       | 60                     | 450                   |                                                                   |                                                                |        |
| V2O5_Ti_50V          | 120           | 16200       | 18                  | 100                        | 0                          | 0                         | 0                          | 0                          | 0                          | 0                          | 0                          | 3                    | 1                     | 80                      | 50                      | 60                     | 0,98                       | 0,02           | 0                   | 0,09                   |                            | 0                       | 60                     | 450                   |                                                                   |                                                                |        |

**Table S2.** – The database of experimental condition and photocatalytic activity under UV-Vis light of investigated TiO<sub>2</sub>-based NTs

| sample label                   | Diameter [nm] | Length [nm] | Wall thickness [nm] | Ti content in foil [% wt.] | Ag content in foil [% wt.] | RE content in foil [% wt.] | Foil surface [cm <sup>2</sup> ] | Number of electrodes | Anodization voltage [V] | Anodization time [min] | Ethylene glycol volume [%] | H <sub>2</sub> O volume [%] | IL amount [mol/dm <sup>3</sup> ] | NH <sub>4</sub> F content [mol/dm <sup>3</sup> ] | Urea content [% weight] | Calcination temp [°C] | UV-Vis (λ>350 nm) phenol photodegradation rate [μmol·dm <sup>-3</sup> ·min <sup>-1</sup> ] | Vis (λ>420 nm) phenol photodegradation rate [μmol·dm <sup>-3</sup> ·min <sup>-1</sup> ] |
|--------------------------------|---------------|-------------|---------------------|----------------------------|----------------------------|----------------------------|---------------------------------|----------------------|-------------------------|------------------------|----------------------------|-----------------------------|----------------------------------|--------------------------------------------------|-------------------------|-----------------------|--------------------------------------------------------------------------------------------|-----------------------------------------------------------------------------------------|
| IL_[EMIM]                      | 100           | 350         | 20                  | 100                        | 0                          | 0                          | 6                               | 3                    | 80                      | 20                     | 0,9                        | 0,1                         | 0,1                              | 0                                                | 0                       | 450                   | 1                                                                                          | 0,2                                                                                     |
| IL_[BMIM]                      | 110           | 450         | 25                  | 100                        | 0                          | 0                          | 6                               | 3                    | 80                      | 20                     | 0,9                        | 0,1                         | 0,1                              | 0                                                | 0                       | 450                   | 1,26                                                                                       | 0,3                                                                                     |
| IL_[OMIM]                      | 120           | 700         | 30                  | 100                        | 0                          | 0                          | 6                               | 3                    | 80                      | 20                     | 0,9                        | 0,1                         | 0,1                              | 0                                                | 0                       | 450                   | 1,53                                                                                       | 0,48                                                                                    |
| IL_[OMIM]_60V                  | 90            | 200         | 15                  | 100                        | 0                          | 0                          | 6                               | 3                    | 60                      | 20                     | 0,9                        | 0,1                         | 0,1                              | 0                                                | 0                       | 450                   | 0,45                                                                                       | 0,16                                                                                    |
| IL_[OMIM]_70V                  | 110           | 600         | 25                  | 100                        | 0                          | 0                          | 6                               | 3                    | 70                      | 20                     | 0,9                        | 0,1                         | 0,1                              | 0                                                | 0                       | 450                   | 1,31                                                                                       | 0,41                                                                                    |
| IL_[OMIM]_90V                  | 135           | 850         | 35                  | 100                        | 0                          | 0                          | 6                               | 3                    | 90                      | 20                     | 0,9                        | 0,1                         | 0,1                              | 0                                                | 0                       | 450                   | 1,82                                                                                       | 0,63                                                                                    |
| IL_[OMIM]_0,2F-                | 124           | 750         | 32                  | 100                        | 0                          | 0                          | 6                               | 3                    | 80                      | 20                     | 0,9                        | 0,1                         | 0,2                              | 0                                                | 0                       | 450                   | 1,58                                                                                       | 0,53                                                                                    |
| IL_[OMIM]_0,3F-                | 129           | 810         | 35                  | 100                        | 0                          | 0                          | 6                               | 3                    | 80                      | 20                     | 0,9                        | 0,1                         | 0,3                              | 0                                                | 0                       | 450                   | 1,65                                                                                       | 0,55                                                                                    |
| IL_[OMIM]_0%H <sub>2</sub> O   | 60            | 200         | 10                  | 100                        | 0                          | 0                          | 6                               | 3                    | 80                      | 20                     | 1                          | 0                           | 0,1                              | 0                                                | 0                       | 450                   | 0,63                                                                                       | 0,25                                                                                    |
| IL_[OMIM]_2,5%H <sub>2</sub> O | 70            | 300         | 15                  | 100                        | 0                          | 0                          | 6                               | 3                    | 80                      | 20                     | 0,98                       | 0,03                        | 0,1                              | 0                                                | 0                       | 450                   | 0,76                                                                                       | 0,32                                                                                    |
| IL_[OMIM]_5,0%H <sub>2</sub> O | 80            | 650         | 20                  | 100                        | 0                          | 0                          | 6                               | 3                    | 80                      | 20                     | 0,95                       | 0,05                        | 0,1                              | 0                                                | 0                       | 450                   | 1,4                                                                                        | 0,39                                                                                    |
| IL_[OMIM]_15%H <sub>2</sub> O  | 115           | 350         | 25                  | 100                        | 0                          | 0                          | 6                               | 3                    | 80                      | 20                     | 0,85                       | 0,15                        | 0,1                              | 0                                                | 0                       | 450                   | 0,89                                                                                       | 0,36                                                                                    |
| IL2_10V                        | 31,8          | 600         | 4,6                 | 100                        | 0                          | 0                          | 6                               | 3                    | 10                      | 60                     | 0,98                       | 0,02                        | 0,01                             | 0,2                                              | 0                       | 450                   | 2,3                                                                                        |                                                                                         |
| IL2_20V                        | 71,1          | 1030        | 9,3                 | 100                        | 0                          | 0                          | 6                               | 3                    | 20                      | 60                     | 0,98                       | 0,02                        | 0,01                             | 0,2                                              | 0                       | 450                   | 3,11                                                                                       |                                                                                         |
| IL2_0.005                      | 101,5         | 1970        | 10,2                | 100                        | 0                          | 0                          | 6                               | 3                    | 30                      | 60                     | 0,98                       | 0,02                        | 0,005                            | 0,2                                              | 0                       | 450                   | 3,48                                                                                       |                                                                                         |
| IL2_0.007                      | 108,8         | 2030        | 12,8                | 100                        | 0                          | 0                          | 6                               | 3                    | 30                      | 60                     | 0,98                       | 0,02                        | 0,007                            | 0,2                                              | 0                       | 450                   | 3,56                                                                                       |                                                                                         |
| IL2_0.01                       | 93,1          | 2050        | 11,1                | 100                        | 0                          | 0                          | 6                               | 3                    | 30                      | 60                     | 0,98                       | 0,02                        | 0,01                             | 0,2                                              | 0                       | 450                   | 3,37                                                                                       |                                                                                         |
| IL2_400                        | 88,5          | 1990        | 8,9                 | 100                        | 0                          | 0                          | 6                               | 3                    | 30                      | 60                     | 0,98                       | 0,02                        | 0,01                             | 0,2                                              | 0                       | 400                   | 3,04                                                                                       |                                                                                         |
| IL2_500                        | 98,7          | 2050        | 9,4                 | 100                        | 0                          | 0                          | 6                               | 3                    | 30                      | 60                     | 0,98                       | 0,02                        | 0,01                             | 0,2                                              | 0                       | 500                   | 3,04                                                                                       |                                                                                         |
| IL2_4%H <sub>2</sub> O         | 96,2          | 1540        | 12,4                | 100                        | 0                          | 0                          | 6                               | 3                    | 30                      | 60                     | 0,96                       | 0,04                        | 0,01                             | 0,2                                              | 0                       | 450                   | 3,44                                                                                       |                                                                                         |
| IL2_6%H <sub>2</sub> O         | 98,8          | 1290        | 15,1                | 100                        | 0                          | 0                          | 6                               | 3                    | 30                      | 60                     | 0,94                       | 0,06                        | 0,01                             | 0,2                                              | 0                       | 450                   | 3,49                                                                                       |                                                                                         |
| IL2_10%H <sub>2</sub> O        | 103,9         | 1220        | 16,1                | 100                        | 0                          | 0                          | 6                               | 3                    | 30                      | 60                     | 0,9                        | 0,1                         | 0,01                             | 0,2                                              | 0                       | 450                   | 3,54                                                                                       |                                                                                         |
| IL2_15%H <sub>2</sub> O        | 114,5         | 1050        | 13,1                | 100                        | 0                          | 0                          | 6                               | 3                    | 30                      | 60                     | 0,85                       | 0,15                        | 0,01                             | 0,2                                              | 0                       | 450                   | 3,58                                                                                       |                                                                                         |
| N-NT_0.2%_20V_1h               | 61            | 1000        | 10,5                | 100                        | 0                          | 0                          | 6                               | 2                    | 20                      | 60                     | 0,98                       | 0,02                        | 0                                | 0,09                                             | 0,2                     | 450                   | 2,13                                                                                       | 0,27                                                                                    |
| N-NT_0.2%_30V_1h               | 76            | 2000        | 11                  | 100                        | 0                          | 0                          | 6                               | 2                    | 30                      | 60                     | 0,98                       | 0,02                        | 0                                | 0,09                                             | 0,2                     | 450                   | 2,34                                                                                       | 0,69                                                                                    |
| N-NT_0.2%_40V_1h               | 89            | 3500        | 10,5                | 100                        | 0                          | 0                          | 6                               | 2                    | 40                      | 60                     | 0,98                       | 0,02                        | 0                                | 0,09                                             | 0,2                     | 450                   | 4,53                                                                                       | 1,33                                                                                    |
| N-NT_0.2%_50V_1h               | 114           | 6800        | 9,5                 | 100                        | 0                          | 0                          | 6                               | 2                    | 50                      | 60                     | 0,98                       | 0,02                        | 0                                | 0,09                                             | 0,2                     | 450                   | 3,45                                                                                       | 1,01                                                                                    |
| N-NT_0.2%_40V_0.5h             | 70            | 1600        | 7                   | 100                        | 0                          | 0                          | 6                               | 2                    | 40                      | 30                     | 0,98                       | 0,02                        | 0                                | 0,09                                             | 0,2                     | 450                   | 2,39                                                                                       | 0,53                                                                                    |
| N-NT_0.2%_40V_2h               | 112           | 4800        | 13,5                | 100                        | 0                          | 0                          | 6                               | 2                    | 40                      | 120                    | 0,98                       | 0,02                        | 0                                | 0,09                                             | 0,2                     | 450                   | 3,72                                                                                       | 1,06                                                                                    |
| N-NT_0.1%_40V_1h               | 72            | 3500        | 4,5                 | 100                        | 0                          | 0                          | 6                               | 2                    | 40                      | 60                     | 0,98                       | 0,02                        | 0                                | 0,09                                             | 0,1                     | 450                   | 4,25                                                                                       | 0,96                                                                                    |
| N-NT_0.3%_40V_1h               | 63            | 3400        | 4,5                 | 100                        | 0                          | 0                          | 6                               | 2                    | 40                      | 60                     | 0,98                       | 0,02                        | 0                                | 0,09                                             | 0,3                     | 450                   | 4,36                                                                                       | 0,8                                                                                     |
| N-NT_0.5%_40V_1h               | 71            | 3400        | 6                   | 100                        | 0                          | 0                          | 6                               | 2                    | 40                      | 60                     | 0,98                       | 0,02                        | 0                                | 0,09                                             | 0,5                     | 450                   | 4,09                                                                                       | 0,48                                                                                    |
| REE2_Ti90Ho10_40V              | 99            | 5600        | 19                  | 90                         | 0                          | 10                         | 6,25                            | 2                    | 40                      | 60                     | 0,98                       | 0,02                        | 0                                | 0,09                                             | 0                       | 450                   | 2,37                                                                                       | 0,45                                                                                    |

| sample label      | Diameter [nm] | Length [nm] | Wall thickness [nm] | Ti content in foil [% wt.] | Ag content in foil [% wt.] | RE content in foil [% wt.] | Foil surface [cm <sup>2</sup> ] | Number of electrodes | Anodization voltage [V] | Anodization time [min] | Ethylene glycol volume [%] | H <sub>2</sub> O volume [%] | IL amount [mol/dm <sup>3</sup> ] | NH <sub>4</sub> F content [mol/dm <sup>3</sup> ] | Urea content [% weight] | Calcination temp [°C] | UV-Vis (λ>350 nm) phenol photodegradation rate [μmol·dm <sup>-3</sup> ·min <sup>-1</sup> ] | Vis (λ> 420 nm) phenol photodegradation rate [μmol·dm <sup>3</sup> ·min <sup>-1</sup> ] |
|-------------------|---------------|-------------|---------------------|----------------------------|----------------------------|----------------------------|---------------------------------|----------------------|-------------------------|------------------------|----------------------------|-----------------------------|----------------------------------|--------------------------------------------------|-------------------------|-----------------------|--------------------------------------------------------------------------------------------|-----------------------------------------------------------------------------------------|
| REE2_Ti90Er10_40V | 98            | 5500        | 19                  | 90                         | 0                          | 10                         | 6,25                            | 2                    | 40                      | 60                     | 0,98                       | 0,02                        | 0                                | 0,09                                             | 0                       | 450                   | 1,82                                                                                       | 0,43                                                                                    |
| REE2_Ti90Nd10_40V | 98            | 5300        | 18                  | 90                         | 0                          | 10                         | 6,25                            | 2                    | 40                      | 60                     | 0,98                       | 0,02                        | 0                                | 0,09                                             | 0                       | 450                   | 3,04                                                                                       | 0,4                                                                                     |
| REE2_Ti90Y10_40V  | 98            | 4500        | 18                  | 90                         | 0                          | 10                         | 6,25                            | 2                    | 40                      | 60                     | 0,98                       | 0,02                        | 0                                | 0,09                                             | 0                       | 450                   | 2,12                                                                                       | 0,13                                                                                    |
| REE2_Ti90Ce10_40V | 96            | 4600        | 17                  | 90                         | 0                          | 10                         | 6,25                            | 2                    | 40                      | 60                     | 0,98                       | 0,02                        | 0                                | 0,09                                             | 0                       | 450                   | 3,09                                                                                       | 0                                                                                       |
| REE2_Ti90Tm10_40V | 95            | 4800        | 17                  | 90                         | 0                          | 10                         | 6,25                            | 2                    | 40                      | 60                     | 0,98                       | 0,02                        | 0                                | 0,09                                             | 0                       | 450                   | 2,96                                                                                       | 0,26                                                                                    |
| Ag2O_Ti95Ag5_30V  | 70            | 1500        | 12                  | 95                         | 5                          | 0                          | 6                               | 3                    | 30                      | 60                     | 0,98                       | 0,02                        | 0                                | 0,09                                             | 0                       | 450                   | 1,61                                                                                       | 0,3                                                                                     |
| Ag2O_Ti90Ag10_30V | 70            | 1500        | 12                  | 90                         | 10                         | 0                          | 6                               | 3                    | 30                      | 60                     | 0,98                       | 0,02                        | 0                                | 0,09                                             | 0                       | 450                   | 2,52                                                                                       | 0,38                                                                                    |
| Ag2O_Ti85Ag15_30V | 70            | 1500        | 12                  | 85                         | 15                         | 0                          | 6                               | 3                    | 30                      | 60                     | 0,98                       | 0,02                        | 0                                | 0,09                                             | 0                       | 450                   | 1,83                                                                                       | 0,5                                                                                     |
| Ag2O_Ti90Ag10_40V | 90            | 3000        | 15                  | 90                         | 10                         | 0                          | 6                               | 3                    | 40                      | 60                     | 0,98                       | 0,02                        | 0                                | 0,09                                             | 0                       | 450                   | 2,66                                                                                       | 0,5                                                                                     |
| Ag2O_Ti90Ag10_50V | 115           | 6000        | 20                  | 90                         | 10                         | 0                          | 6                               | 3                    | 50                      | 60                     | 0,98                       | 0,02                        | 0                                | 0,09                                             | 0                       | 450                   | 2,89                                                                                       | 0,41                                                                                    |
| IL4_0.05          | 107           | 6000        | 5,4                 | 100                        | 0                          | 0                          | 6                               | 3                    | 40                      | 60                     | 0,97                       | 0,03                        | 0,005                            | 0,2                                              | 0                       | 450                   | 9,12                                                                                       |                                                                                         |
| IL4_0.1           | 114           | 6200        | 9,4                 | 100                        | 0                          | 0                          | 6                               | 3                    | 40                      | 60                     | 0,96                       | 0,04                        | 0,01                             | 0,2                                              | 0                       | 450                   | 8,35                                                                                       |                                                                                         |
| IL4_0.2           | 115           | 6200        | 10                  | 100                        | 0                          | 0                          | 6                               | 3                    | 40                      | 60                     | 0,95                       | 0,05                        | 0,021                            | 0,2                                              | 0                       | 450                   | 8,45                                                                                       |                                                                                         |
| IL4_0.3           | 119           | 6800        | 11                  | 100                        | 0                          | 0                          | 6                               | 3                    | 40                      | 60                     | 0,94                       | 0,06                        | 0,031                            | 0,2                                              | 0                       | 450                   | 8,38                                                                                       |                                                                                         |
| IL4_0.5           | 133           | 7200        | 13                  | 100                        | 0                          | 0                          | 6                               | 3                    | 40                      | 60                     | 0,93                       | 0,07                        | 0,051                            | 0,2                                              | 0                       | 450                   | 8,59                                                                                       |                                                                                         |
| IL4_1.0           | 140           | 8100        | 15                  | 100                        | 0                          | 0                          | 6                               | 3                    | 40                      | 60                     | 0,92                       | 0,08                        | 0,103                            | 0,2                                              | 0                       | 450                   | 7,1                                                                                        |                                                                                         |

$y_i$  – observed dependent variable

$\hat{y}_i$  – calculated dependent variable

$\bar{y}$  – mean value of the dependent variable

$\hat{y}_{i/i}$  – response of the i-th object estimated by using a model obtained without using the i-th object

$\bar{\hat{y}}$  – average of all  $\hat{y}_i$

$\bar{\hat{y}}_{CV}$  – is the average of all  $\hat{y}_{i/i}$

$\bar{y}_{TR}$  – average of training observed responses

$\bar{y}_{EXT}$  – average of external observed responses

$n_{EXT}$  – number of external samples

$n_{TR}$  – number of training samples

$p$  – number of predictor variables

Table S3 – list of equations for calculated model statistics

| Statistic                         | Source | Definition                                                           | Equation                                                                                                                                                                                                                                       |
|-----------------------------------|--------|----------------------------------------------------------------------|------------------------------------------------------------------------------------------------------------------------------------------------------------------------------------------------------------------------------------------------|
| $R^2$                             | [12]   | Coefficient of determination                                         | $R^2 = 1 - \frac{\sum_{i=1}^{n_{EXT}} (y_i - \hat{y}_i)^2}{\sum_{i=1}^{n_{EXT}} (y_i - \bar{y})^2}$                                                                                                                                            |
| $RMSE_C$ (RMSE <sub>tr</sub> )    | [13]   | Root Mean Square Error in fitting                                    | $RMSE_C = \sqrt{\frac{\sum (y_i - \hat{y}_i)^2}{n_{EXT}}}$                                                                                                                                                                                     |
| $R_{adj}^2$                       | [13]   | Adjusted $R^2$                                                       | $R_{adj}^2 = (1 - R^2) * \left( \frac{n - 1}{n - p} \right)$                                                                                                                                                                                   |
| $CCC_{tr}$                        | [12]   | Concordance correlation coefficient calculated over the training set | $CCC_{tr} = \frac{2 \sum_{i=1}^{n_{EXT}} (y_i - \bar{y})(\hat{y}_i - \bar{\hat{y}})}{\sum_{i=1}^{n_{EXT}} (y_i - \bar{y})^2 + \sum_{i=1}^{n_{EXT}} (\hat{y}_i - \bar{\hat{y}})^2 + n_{EXT}(\bar{y} - \bar{\hat{y}})^2}$                        |
| $MAE_{tr}$ (MAE <sub>calc</sub> ) | [12]   | Mean Absolute Error using on fitting                                 | $MAE_{tr} = \frac{\sum  y_i - \hat{y}_i }{n_{EXT}}$                                                                                                                                                                                            |
| $Q^2_{Loo}$                       | [12]   | Correlation coefficient for leave-one-out cross-validation           | $Q^2_{Loo} = 1 - \frac{\sum_{i=1}^{n_{EXT}} (y_i - \hat{y}_{i/i})^2}{\sum_{i=1}^{n_{EXT}} (y_i - \bar{y})^2}$                                                                                                                                  |
| $RMSE_{CV}$                       | [13]   | Root Mean Square Error using cross validation prediction             | $RMSE_{CV} = \sqrt{\frac{\sum (y_i - \hat{y}_{i/i})^2}{n_{EXT}}}$                                                                                                                                                                              |
| $CCC_{CV}$                        | [13]   | Concordance correlation coefficient calculated in cross validation   | $CCC_{CV} = \frac{2 \sum_{i=1}^{n_{EXT}} (y_i - \bar{y})(\hat{y}_{i/i} - \bar{\hat{y}}_{CV})}{\sum_{i=1}^{n_{EXT}} (y_i - \bar{y})^2 + \sum_{i=1}^{n_{EXT}} (\hat{y}_{i/i} - \bar{\hat{y}}_{CV})^2 + n_{EXT}(\bar{y} - \bar{\hat{y}}_{CV})^2}$ |
| $MAE_{CV}$                        | [13]   | Mean Absolute Error using cross validation predictions               | $MAE_{CV} = \frac{\sum  y_i - \hat{y}_{i/i} }{n_{EXT}}$                                                                                                                                                                                        |
| $Q^2_{F1}$                        | [12]   | External validation coefficient                                      | $Q^2_{F1} = 1 - \frac{\sum_{i=1}^{n_{EXT}} (\hat{y}_i - y_i)^2}{\sum_{i=1}^{n_{EXT}} (y_i - \bar{y}_{TR})^2}$                                                                                                                                  |
| $Q^2_{F2}$                        | [12]   | External validation coefficient                                      | $Q^2_{F2} = 1 - \frac{\sum_{i=1}^{n_{EXT}} (\hat{y}_i - y_i)^2}{\sum_{i=1}^{n_{EXT}} (y_i - \bar{y}_{EXT})^2}$                                                                                                                                 |



| Statistic               | Source | Definition                                    | Equation                                                                                                                                                                                                                  |
|-------------------------|--------|-----------------------------------------------|---------------------------------------------------------------------------------------------------------------------------------------------------------------------------------------------------------------------------|
| $Q_{F3}^2$              | [12]   | External validation coefficient               | $Q_{F3}^2 = 1 - \frac{\frac{\sum_{i=1}^{n_{EXT}} (\hat{y}_i - y_i)^2}{n_{EXT}}}{\frac{\sum_{i=1}^{n_{EXT}} (y_i - \bar{y}_{TR})^2}{n_{TR}}}$                                                                              |
| $R_{EXT}^2$             | [13]   | External determination coefficient            | $R_{EXT}^2 = 1 - \frac{\sum_{i=1}^{n_{EXT}} (\hat{y}_i - y_i)^2}{\sum_{i=1}^{n_{EXT}} (y_i - \bar{y})^2}$                                                                                                                 |
| $RMSE_{EXT}$<br>(RMSEP) | [13]   | Root Mean Square Error in external prediction | $RMSE_{EXT} = \sqrt{\frac{\sum_{i=1}^{n_{EXT}} (\hat{y}_i - y_i)^2}{n_{EXT}}}$                                                                                                                                            |
| $CCC_{EXT}$             | [13]   | Concordance correlation coefficient           | $CCC_{EXT} = \frac{2 \sum_{i=1}^{n_{EXT}} (y_i - \bar{y})(\hat{y}_i - \bar{\hat{y}})}{\sum_{i=1}^{n_{EXT}} (y_i - \bar{y})^2 + \sum_{i=1}^{n_{EXT}} (\hat{y}_i - \bar{\hat{y}})^2 + n_{EXT} (\bar{y} - \bar{\hat{y}})^2}$ |
| $MAE_{EXT}$             | [12]   | Mean Absolute Error in external prediction    | $MAE_{EXT} = \frac{\sum_{i=1}^{n_{EXT}}  \hat{y}_i - y_i }{n_{EXT}}$                                                                                                                                                      |
| <b>F</b>                | [13]   | F-value                                       | $F = \frac{\frac{\sum_{i=1}^{n_{EXT}} (\hat{y}_i - \bar{y})^2}{p}}{\frac{(\hat{y}_i - y_i)^2}{n - p - 1}}$                                                                                                                |

1. Mazierski, P.; Łuczak, J.; Lisowski, W.; Winiarski, M.J.; Klimczuk, T.; Zaleska-Medynska, A. The ILs-Assisted Electrochemical Synthesis of TiO<sub>2</sub> Nanotubes: The Effect of Ionic Liquids on Morphology and Photoactivity. *Appl Catal B Environ* **2017**, *214*, 100–113, doi:10.1016/j.apcatb.2017.05.005.

2. Pancielejko, A.; Mazierski, P.; Lisowski, W.; Zaleska-Medynska, A.; Łuczak, J. Ordered TiO<sub>2</sub> Nanotubes with Improved Photoactivity through Self-Organizing Anodization with the Addition of an Ionic Liquid: Effects of the Preparation Conditions. *Acs Sustain Chem Eng* **2019**, *7*, 15585–15596, doi:10.1021/acssuschemeng.9b03589.

3. Nischk, M.; Mazierski, P.; Wei, Z.; Siuzdak, K.; Kouame, N.A.; Kowalska, E.; Remita, H.; Zaleska-Medynska, A. Enhanced Photocatalytic, Electrochemical and Photoelectrochemical Properties of TiO<sub>2</sub> Nanotubes Arrays Modified with Cu, AgCu and Bi Nanoparticles Obtained via Radiolytic Reduction. *Appl Surf Sci* **2016**, *387*, 89–102, doi:10.1016/j.apsusc.2016.06.066.

4. Mazierski, P.; Nischk, M.; Gołkowska, M.; Lisowski, W.; Gazda, M.; Winiarski, M.J.; Klimczuk, T.; Zaleska-Medynska, A. Photocatalytic Activity of Nitrogen Doped TiO<sub>2</sub> Nanotubes Prepared by Anodic Oxidation: The Effect of Applied Voltage, Anodization Time and Amount of Nitrogen Dopant. *Appl Catal B Environ* **2016**, *196*, 77–88, doi:10.1016/j.apcatb.2016.05.006.
5. Mazierski, P.; Lisowski, W.; Grzyb, T.; Winiarski, M.J.; Klimczuk, T.; Mikołajczyk, A.; Flisikowski, J.; Hirsch, A.; Kołakowska, A.; Puzyn, T.; et al. Enhanced Photocatalytic Properties of Lanthanide-TiO<sub>2</sub> Nanotubes: An Experimental and Theoretical Study. *Appl Catal B Environ* **2017**, *205*, 376–385, doi:10.1016/j.apcatb.2016.12.044.
6. Parnicka, P.; Mazierski, P.; Lisowski, W.; Klimczuk, T.; Nadolna, J.; Zaleska-Medynska, A. A New Simple Approach to Prepare Rare-Earth Metals-Modified TiO<sub>2</sub> Nanotube Arrays Photoactive under Visible Light: Surface Properties and Mechanism Investigation. *Results Phys* **2019**, *12*, 412–423, doi:10.1016/j.rinp.2018.11.073.
7. Mazierski, P.; Malankowska, A.; Kobylański, M.; Diak, M.; Kozak, M.; Winiarski, M.J.; Klimczuk, T.; Lisowski, W.; Nowaczyk, G.; Zaleska-Medynska, A. Photocatalytically Active TiO<sub>2</sub>/Ag<sub>2</sub>O Nanotube Arrays Interlaced with Silver Nanoparticles Obtained from the One-Step Anodic Oxidation of Ti–Ag Alloys. *ACS Catal* **2017**, *7*, 2753–2764, doi:10.1021/acscatal.7b00056.
8. Mazierski, P.; Nadolna, J.; Nowaczyk, G.; Lisowski, W.; Winiarski, M.J.; Klimczuk, T.; Kobylański, M.P.; Jurga, S.; Zaleska-Medynska, A. Highly Visible-Light-Photoactive Heterojunction Based on TiO<sub>2</sub> Nanotubes Decorated by Pt Nanoparticles and Bi<sub>2</sub>S<sub>3</sub> Quantum Dots. *J Phys Chem C* **2017**, *121*, 17215–17225, doi:10.1021/acs.jpcc.7b03895.
9. Pancielejko, A.; Mazierski, P.; Lisowski, W.; Zaleska-Medynska, A.; Kosek, K.; Łuczak, J. Facile Formation of Self-Organized TiO<sub>2</sub> Nanotubes in Electrolyte Containing Ionic Liquid-Ethylammonium Nitrate and Their Remarkable Photocatalytic Properties. *ACS Sustain Chem Eng* **2018**, *6*, 14510–14522, doi:10.1021/acssuschemeng.8b03154.
10. Nevárez-Martínez, M.C.; Kobylański, M.P.; Mazierski, P.; Wólkiewicz, J.; Trykowski, G.; Malankowska, A.; Kozak, M.; Espinoza-Montero, P.J.; Zaleska-Medynska, A. Self-Organized TiO<sub>2</sub>–MnO<sub>2</sub> Nanotube Arrays for Efficient Photocatalytic Degradation of Toluene. *Mol J Synthetic Chem Nat Prod Chem* **2017**, *22*, 564, doi:10.3390/molecules22040564.
11. Nevárez-Martínez, M.C.; Mazierski, P.; Kobylański, M.P.; Szczepańska, G.; Trykowski, G.; Malankowska, A.; Kozak, M.; Espinoza-Montero, P.J.; Zaleska-Medynska, A. Growth, Structure, and Photocatalytic Properties of Hierarchical V<sub>2</sub>O<sub>5</sub>–TiO<sub>2</sub> Nanotube Arrays Obtained from the One-Step Anodic Oxidation of Ti–V Alloys. *Mol J Synthetic Chem Nat Prod Chem* **2017**, *22*, 580, doi:10.3390/molecules22040580.
12. Chirico, N.; Gramatica, P. Real External Predictivity of QSAR Models: How To Evaluate It? Comparison of Different Validation Criteria and Proposal of Using the Concordance Correlation Coefficient. *J Chem Inf Model* **2011**, *51*, 2320–2335, doi:10.1021/ci200211n.
13. Gramatica, P.; Chirico, N.; Papa, E.; Cassani, S.; Kovarich, S. QSARINS: A New Software for the Development, Analysis, and Validation of QSAR MLR Models. *J Comput Chem* **2013**, *34*, 2121–2132, doi:10.1002/jcc.23361.
